# Supplementary material
Source: PubMed Central journal article supplement (PMC6276943)

**Appendix 1 (as supplied by the authors): Model results for relationship of changes of PSI event and medico-legal cases**

Fig. A1 All specialty model results

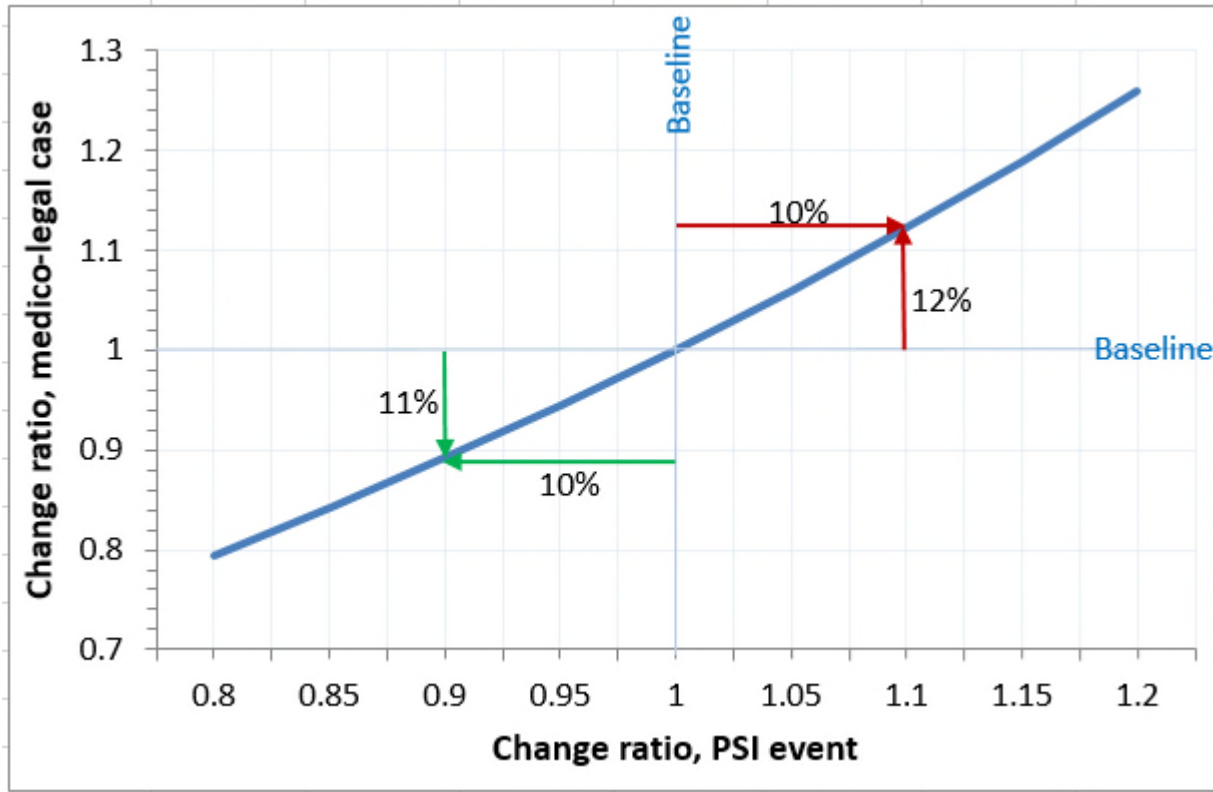

Fig. A2 Obstetrical model results

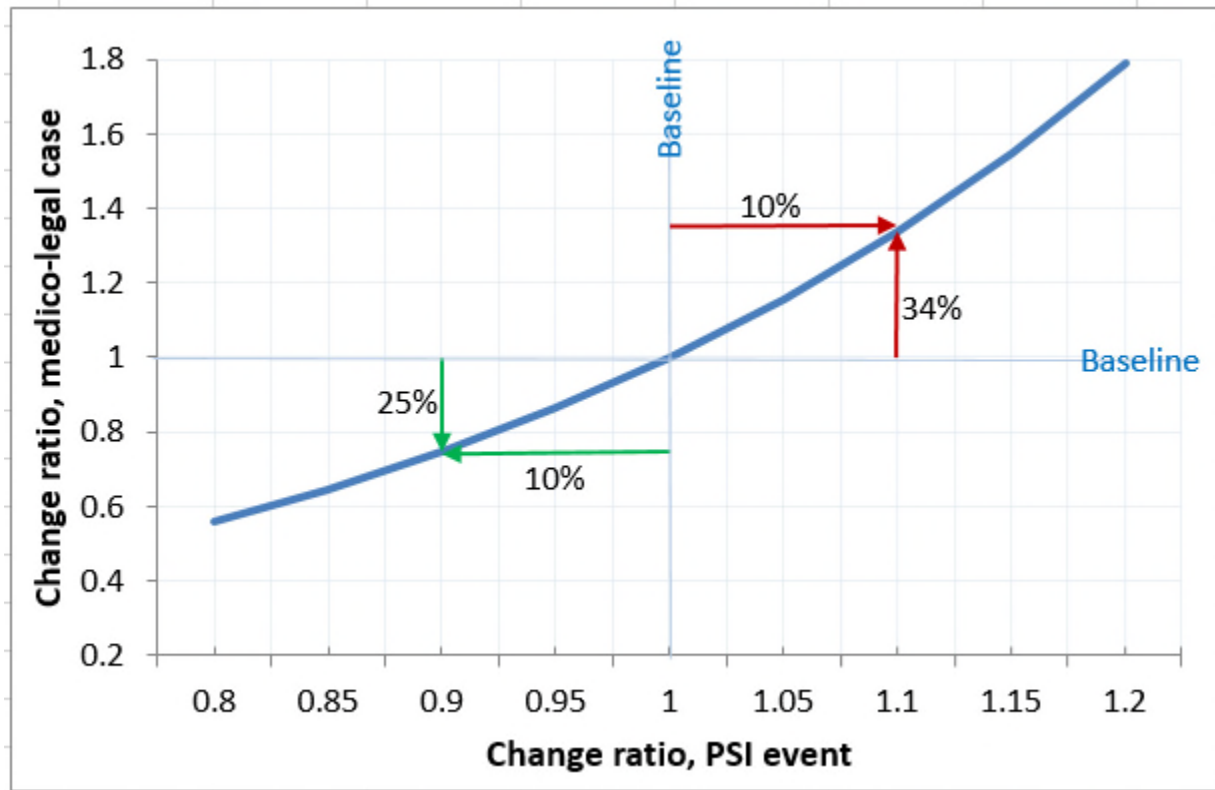

Fig. A3 Surgical model results

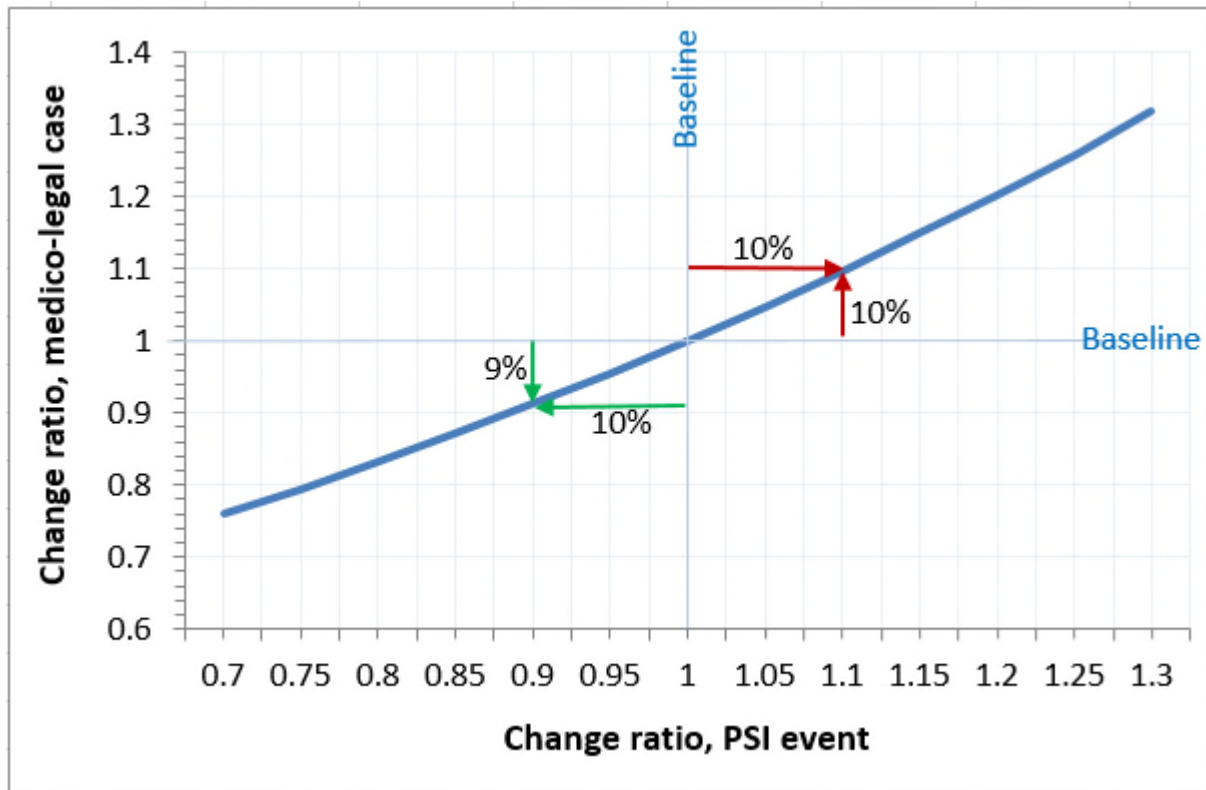

Supplement: supp_6.4.E561_2018-0077-1-at.pdf [file supp_6.4.E561_2018-0077-1-at.pdf]
