# Supplementary material
Source: PubMed Central journal article supplement (PMC6276943)
Supplement: supp_6.4.E561_2018-0077-original_submission.pdf [file supp_6.4.E561_2018-0077-original_submission.pdf]

1 **Title:** Improved hospital safety performance and reduced medico-legal risk: an ecological study  
2 using two Canadian databases  
3

4 **Authors:** Qian Yang MSc,\* Cathy Zhang MSc,\* Kristen Hines, BA\* Lisa Calder MD, MSc,  
5 FRCPC\*†‡  
6

7 **Affiliations:** \*The Canadian Medical Protective Association; †the Ottawa Hospital Research  
8 Institute;‡Department of Emergency Medicine University of Ottawa  
9

10 **Correspondence to:** Dr. Lisa Calder, 875 Carling Avenue, Ottawa, Ontario, Canada, K1S 5P1,  
11 Email: lcalder@cmpa.org, Telephone: 1-613-725-2000  
12  
13

14 **Abstract word count:** 250

15 **Article word count:** 2,629  
16  
17

## 18 **Acknowledgements**

19

20 These results were presented at the 2016 Annual Conference of the Canadian Association for Health Services  
21 and Policy Research (CAHSPR).  
22

- 23 • Parts of this material are based on data and information provided by the Canadian Institute for Health  
24 Information. However, the analyses, conclusions, opinions and statements expressed herein are those of the  
25 author, and not necessarily those of the Canadian Institute for Health Information.  
26

27 The authors would like to thank Dr. Allan McDougall for providing editorial support for this manuscript, as well  
28 as Ria De Gorter for supporting the manuscript submission process.  
29  
30

31 **Competing interests:** No competing interests to declare.  
32  
33  
34  
35  
36  
37  
38  
39  
40  
41  
42  
43  
44  
45  
46  
47  
48  
49  
50  
51  
52  
53  
54  
55  
56  
57  
58  
59  
60

# Improved hospital safety performance and reduced medico-legal risk: an ecological study using two Canadian databases

## ABSTRACT

**Background:** We sought to determine if there was a relationship between in-hospital patient safety events and medico-legal cases involving physicians in Canada. **Methods:** In this ecological study, we used Poisson regression to compare data from the Canadian Institute for Health Information's Discharge Abstract Database and the Canadian Medical Protective Association's database of medico-legal cases over a 10-year period (April 1, 2005 and March 31, 2015). We identified patient safety events based on 15 Agency for Healthcare Research and Quality patient safety indicators within the Canadian Institute for Health Information and Canadian Medical Protective Association datasets. Subgroup analyses were performed for obstetrical and surgical cases. **Results:** We found a statistically significant positive association between volume changes in patient safety indicator events ( $n = 324,592$ ) and medico-legal cases ( $n = 15,180$ ) (parameter estimate: 1.15; 95% CI, 0-1.9). This association suggests that, on average, a 10% decrease in events would correspond to a decrease of 11% in medico-legal cases. The degree of positive association varied by practice type, with obstetrics (patient safety indicator events:  $n = 97,982$ ; cases:  $n = 865$ ) showing a 25% decrease in medico-legal cases for every 10% decrease in events (parameter estimate: 2.9, 95% CI, 0.5-5.3); and surgery (patient safety indicator events:  $n = 168,886$ ; cases:  $n = 4,568$ ), a decrease of 9% for every 10% fewer events (parameter estimate: 0.9, 95% CI, 0.2-1.7). **Interpretation:** Our findings suggest new, practical uses for medico-legal and patient safety indicator data for improving patient safety and quality of care .

**Keywords:** malpractice; health care economics and organizations; quality indicators, health care; patient safety; Canada

## INTRODUCTION

1  
2  
3 The number and scope of patient safety and quality improvement initiatives are growing, and these activities are  
4 increasingly being tied to incentives such as funding and accreditation. Because of their impact on hospital budgets  
5 and provider time, there is a pressing need to identify which safety or quality improvement targets have the potential  
6 to produce the greatest benefits. At the same time, there is a drive to simplify the measures through which quality  
7 and safety are evaluated. Although administrative data including the Agency for Healthcare Research and Quality's  
8 patient safety indicators have been used to measure quality improvement and patient safety, their suitability for  
9 these purposes has been debated.(1, 2)

10  
11  
12  
13  
14  
15  
16  
17  
18 In the field of patient safety, many studies have evaluated the impact of health care system  
19 improvements on medical liability, with much of this work focusing on obstetrics.(3-12) Other research has  
20 attempted to study the link between the patient experience and various measures of quality and safety, with  
21 overall findings of a positive association between patient satisfaction, clinical effectiveness and patient  
22 safety.(13) However, to date few empirical studies have attempted to validate the existence of a relationship  
23 between medico-legal risk and hospital patient safety performance, or to measure the effects of this  
24 association.

25  
26  
27  
28  
29  
30  
31  
32  
33  
34 In 2010, the RAND Corporation's Institute for Civil Justice evaluated the relationship between patient  
35 safety incidents and malpractice claims in California over a 5-year period. That study used the Agency for  
36 Healthcare Research and Quality's patient safety indicators to identify patient safety incidents, and found a  
37 linear relationship that represented a decrease of 3.7 malpractice claims for every 10 fewer incidents. That  
38 study also confirmed that the correlation held true across multiple medical specialties.(14) The objective of our  
39 study was to determine and quantify the relationship between in-hospital patient safety events and medico-  
40 legal cases involving physicians in Canada.

## METHODS

### Setting, study design and data sources

41  
42  
43  
44  
45  
46  
47  
48  
49  
50  
51  
52  
53  
54  
55 We used methods similar to those of the RAND study to analyze 10 years of data from the Canadian Institute for  
56 Health Information, an agency that collects and reports on data related to Canada's health care system, and the

1 Canadian Medical Protective Association, a non-profit mutual defense organization that provides medico-legal  
2 advice and assistance to physicians. At the time of this study, over 93,000 physicians were members of the  
3 Canadian Medical Protective Association (>95% of practicing Canadian physicians). In this ecological study,  
4 improvements in hospital patient safety performance were measured by the annual changes in the frequency of  
5 these patient safety indicator events.  
6  
7  
8  
9

10  
11 We selected 15 patient safety indicators from the Agency for Healthcare Research and Quality's *Patient Safety*  
12 *Indicators v5.0*, (15) that could be identified in Canadian hospital data (see Table 1). "PSI 02 Death Rate in  
13 Low-Mortality Diagnosis Related Groups (DRGs)" and "PSI 04 Death Rate among Surgical Inpatients with  
14 Serious Treatable Conditions" were not included as they could not be identified in the Discharge Abstract  
15 Database due to their reliance on diagnosis-related groups, which are not used as a classification system in  
16 Canada. "PSI 09 Perioperative Hemorrhage or Hematoma Rate" was not included because it could not be  
17 identified in the Discharge Abstract Database due to differences in the ICD coding classification revisions used  
18 by the Agency for Healthcare Research and Quality and the Canadian Institute for Health Information for the  
19 study period. That is, Agency for Healthcare Research and Quality version 5 patient safety indicators were  
20 defined using ICD-9-CM, while the Canadian Institute for Health Information implemented ICD-10-CA coding in  
21 2005.  
22  
23  
24  
25  
26  
27  
28  
29  
30  
31  
32  
33  
34

35 The Discharge Abstract Database is a key database of the Canadian Institute for Health Information. It  
36 captures administrative, clinical and demographic information on hospital discharges. This database contains  
37 in-patient discharge data from all Canadian hospitals with the exception of hospitals in the province of Quebec.  
38 The database records about 2.5 million in-patient hospitalizations each year. The Canadian Medical Protective  
39 Association maintains a national database that contains information on medico-legal cases involving Canadian  
40 physicians. Medico-legal cases are coded by a team of professionals with nursing or health information  
41 expertise who review the medical issues and legal information in each case. Medical coding follows national  
42 standards and in-house developed analytical frameworks. (15) To reduce the risk of misclassification, coders  
43 conduct weekly quality assurance reviews of case coding. (17)  
44  
45  
46  
47  
48  
49  
50  
51  
52  
53  
54

55 For this study, we compared 10 years of data from both databases, from April 1, 2005 to March 31,  
56 2015. To be consistent with the data available to us through the Discharge Abstract Database, medico-legal  
57  
58  
59  
60

cases that occurred in Québec were excluded from the Canadian Medical Protective Association dataset.

Medico-legal case volume was represented by the frequency of all medico-legal cases that included not only civil legal actions, but also medical regulatory authority and hospital complaints (Table 2). Because patients or their families may choose different pathways to bring a case forward, we elected to include all three case types to present a fuller picture of the overall medico-legal landscape.

The unit of analysis from both databases was event volume by region and by year. Event volume was represented the number of patient safety indicator events in the Discharge Abstract Database and number of medico-legal cases in the CMPA database. The provinces of British Columbia, Alberta, Ontario, each formed a region on their own, while provinces with smaller population and the territories were combined into one region for measurement stability. For each region, the average number of medico-legal cases across the 10-year study period was used as the denominator, and the medico-legal case volume was standardized by calculating the annual ratio of the case count to the regional average. This standardized value of the medico-legal cases was the response variable in the regression models as illustrated by the following equation:

$$Standard\ Volume_{region,year} = \frac{Annual\ Frequency_{region,year}}{10year\ Average_{region}}$$

Similarly, events from the Discharge Abstract Database were standardized by region and by year. This standardized patient safety indicator event volume was used as the main predictor in the regression models.

Obstetrics and surgery are known to be unique practice types, such that they are each more likely to see specific types of patient safety indicator events. Therefore, we built separate models for these subgroups to test for associations between patient safety indicator events and medico-legal cases. Within the same model, if a case from the Discharge Abstract Database was involved in more than one patient safety indicator event, it was counted only once. When a case included events that were related to different models, the case was counted separately in the relevant models.

While the purpose of this study was to examine the relationship of hospital safety and medico-legal risk, there were no unique patient identifiers available to link the cases. As such, it was not possible to perform case-level data linkages between the Discharge Abstract Database discharge records and medico-legal cases.

## Statistical analysis

We used Poisson regression analysis with a log-linear link to test the significance of the association between volume changes for patient safety indicator events and medico-legal cases. To distribute expertise and reduce bias, two statisticians (QY and CZ) analyzed the data using SAS software v9.2 (SAS Institute, Cary, NC, USA). Considering the longitudinal nature of the data (i.e. the correlation of repeated measurements from the same region in different years), we used generalized estimating equations to address autocorrelation among responses. We included a set of year and region variables as well as their interaction terms to control for additional variations caused by temporal and regional difference in demographics, health care services, and legal systems. The exponentiated parameter estimates for the patient safety indicator events were the expected effects of changing volume of patient safety indicator events on the volume of medico-legal cases. When the models showed statistical significance in these events, we plotted such effects using the parameter estimates to illustrate the association between the volume of patient safety indicator events and that of medico-legal cases.

## RESULTS

A total of 324,592 distinct records from the Discharge Abstract Database were used to construct the standardized values for the models. Because some of these records contain more than one patient safety indicator event, a total of 339,741 patient safety indicator events were found in these records. From the Canadian Medical Protective Association database, 15,180 medico-legal cases were used for the models (Table 2). Figures 1A) and B) show the regional trends of medico-legal cases and the standardized ratios of annual case volume to regional average, respectively. The volume decreases seen in the Canadian Medical Protective Association data in the last few years can be explained by a lag time that exists between when an event occurs and a case is initiated. In general, about 50% of cases are reported within 2 years of the occurrence of the event, while 90% are reported within 4 years. To control for this time effect, we created a variable for year in the models to explain the artificial drop between event occurrence and medico-legal case initiation. As this artificial drop is not always the same across years (e.g., not always a linear decrease, or the speed of decrease changed from year to year) and Year is a continuous interval variable, we also added a second-order term of Year into the models at the beginning of regression process. Figures 1C) and D) show

1 the regional trends of patient safety indicator events from the Discharge Abstract Database and the  
2 standardized ratios of annual incident volume to regional average, respectively.  
3  
4

5 The modelling results are reported in Table 3. The parameter estimate for the patient safety indicator  
6 event volume suggest a significant positive association, (1.15, 95% confidence interval [CI], 0.4–1.9;  $p =$   
7 0.003), between volume changes in patient safety indicator events and medico-legal cases when controlling for  
8 region and year.  
9  
10  
11  
12

13  
14 The annual ratio of patient safety indicator events varied between 0.9 and 1.1, as shown in Figure 1D).  
15 When the relationship between patient safety indicator events and medico-legal cases was plotted within this  
16 range applying the model results, it appeared to be approximately linear (Appendix A, Figure i). This projects that  
17 a region with a 10% increase in patient safety indicator events would see a corresponding increase of 12% in  
18 medico-legal cases, or alternatively for a 10% decrease in patient safety indicator events, an 11% decrease in  
19 medico-legal cases.  
20  
21  
22  
23  
24  
25  
26  
27

28 The obstetrical model analyzed 97,982 patient safety indicator events identified in the Discharge  
29 Abstract Database (or 97,982 distinct Discharge Abstract Database records that involved an obstetrical patient  
30 safety indicator event), and 865 obstetrics-related medico-legal cases. The surgical model analyzed 168,886  
31 patient safety indicator events from the Discharge Abstract Database (or 160,598 distinct Discharge Abstract  
32 Database records that involved at least one surgical patient safety indicator event) and 4,568 medico-legal  
33 cases. Regional annual change ratios for both patient safety indicator events and medico-legal cases were  
34 calculated in the same way as the all-cases model for both specialty models. The obstetrics model showed a  
35 25% decrease in medico-legal cases for every 10% decrease in events; and for surgery, a decrease of 9% for  
36 every 10% fewer events, as shown in Appendix A, Figure ii and iii.  
37  
38  
39  
40  
41  
42  
43  
44  
45  
46  
47

48 Notably, obstetrical medico-legal cases showed the greatest rate reduction when patient safety  
49 indicator events decreased, lending weight to the potential benefits of quality interventions in this area. The  
50 obstetrical case modelling results are shown in Table 3 and suggest a significant positive association (2.9, 95%  
51 CI, 0.5–5.3;  $p = 0.02$ ). This projects that a region with a 10% decrease in patient safety indicator events would  
52 see a corresponding decrease of 25% in medico-legal cases. However, the degree of increase in medico-legal  
53 case volume is far greater than that of the patient safety indicator event, with an average of 34% increase for  
54  
55  
56  
57  
58  
59  
60



every 10% of patient safety indicator increase. The surgical case modelling results, shown in Table 3, also suggest a significant positive association (0.9, 95% CI, 0.2–1.7;  $p = 0.02$ ). This projects that a region with a 10% increase in patient safety indicator events would see a corresponding increase of 10% in medico-legal cases or, alternatively, for a decrease of 10% in patient safety indicator events, a 9% decrease in medico-legal cases.

## INTERPRETATION

This comparison of two Canadian databases suggests a relationship between hospital safety performance and medico-legal risk in Canada. The degree of positive association varied by practice type, with obstetrics showing a stronger relationship. This association may reflect the severity of events encompassed by patient safety indicator 17, which include neurological injury to the infant. These types of injuries are a major source of malpractice litigation for obstetricians given the vulnerability of patients and lifelong care costs associated with these events.

This study joins a small body of research that has found relationships between patient safety indicator events and increased medico-legal risk,(16) lower safety culture scores(17) and patient ratings of physicians and nurses,(18) and poorer performance on other measures of safety and quality.(19, 20) Our results are consistent with those of studies that have shown that improved safety and quality is associated with decreased medico-legal risk.(3-12)

At the system level, longitudinal medico-legal data trends can be used to clearly illustrate the institutional impact of quality improvement and patient safety initiatives for frontline providers. Therefore, our results may support efforts to position patient safety at the forefront of medical malpractice reform by demonstrating that reduced medico-legal liability could be a secondary benefit to improved patient safety. Although researchers have questioned the use of patient safety indicators and other administrative data sources for quality improvement purposes on the basis of inadequate reliability(1) and clinical relevance,(2) this study suggests that the current set of indicators may represent a more consistent measure of patient safety than previously argued.

## Limitations

This study also had limitations. Because the patient safety indicators are acute care–related, they do not reflect the full spectrum of clinical care. Also, while the Discharge Abstract Database includes all in-patient health event data, Canadian Medical Protective Association data include only those cases that involved a physician. It



1 is important to note that although the Canadian Medical Protective Association represents most physicians in  
2 Canada, members report hospital and regulatory authority complaints to the Canadian Medical Protective  
3 Association at their own discretion, and therefore these cases do not represent a complete picture of all such  
4 cases in Canada. Furthermore, to ensure comparability between datasets, medico-legal cases from the  
5 province of Québec were not included in this analysis, as data from the province were not available from the  
6 Canadian Institute for Health Information. Therefore, our results do not represent a complete picture of  
7 Canada.  
8  
9  
10  
11  
12  
13  
14  
15

16 Sample sizes for medico-legal cases were relatively small for obstetrical cases at the regional level,  
17 and the confidence intervals for the parameter estimates were wide. This is explained in part by the fact that  
18 because obstetrical cases often concern patients of minority age, they have longer limitation periods (generally  
19 when the plaintiff reaches age 18 years plus 2 years) resulting in longer lag times between event occurrence  
20 and medico-legal case initiation. Complaints to hospitals and regulatory authorities represented a significant  
21 portion of the medico-legal cases included in this analysis. The characteristics of these types of cases may  
22 differ from those of legal actions. For example, while the majority of legal actions relate to allegations of harm,  
23 hospital and regulatory authority complaints often involve communication, manner, and administrative issues. It  
24 should be noted that even those cases not directly associated with harm from healthcare delivery may  
25 nonetheless reflect important elements of patient safety culture.  
26  
27  
28  
29  
30  
31  
32  
33  
34  
35  
36  
37

### 38 **Conclusion**

39 Although the reasons why medico-legal cases arise are often complex and multifactorial, the statistically  
40 significant positive association between patient safety indicator events and medico-legal cases quantifies a  
41 relationship between patient safety and medico-legal risk in Canadian hospitals. These findings challenge  
42 critiques about the suitability of the Agency for Healthcare Research and Quality's patient safety indicators as  
43 measures of safety and quality and suggest new practical uses for both medico-legal and patient safety  
44 indicator data in system-level quality improvement efforts.  
45  
46  
47  
48  
49  
50  
51  
52  
53  
54  
55  
56  
57  
58  
59  
60

## References

1. Winters BD, Bharmal A, Wilson RF, Zhang A, Engineer L, Defoe D, et al. Validity of the Agency for Health Care Research Quality Patient Safety Indicators and the Centers for Medicare and Medicaid Hospital-acquired conditions. *Medical care*. 2016;54(12):1105-11.
2. Kachalia A, Mello MM, Nallamotheu BK, Studdert DM. Legal and Policy Interventions to Improve Patient Safety. *Circulation*. 2016;133(7):661-71.
3. Clark SL, Belfort MA, Byrum SL, Meyers JA, Perlin JB. Improved outcomes, fewer cesarean deliveries, and reduced litigation: results of a new paradigm in patient safety. *Am J Obstet Gynecol*. 2008;199(2):105 e1-7.
4. Grunebaum A, Chervenak F, Skupski D. Effect of a comprehensive obstetric patient safety program on compensation payments and sentinel events. *Am J Obstet Gynecol*. 2011;204(2):97-105.
5. Howell AM, Burns EM, Bouras G, Donaldson LJ, Athanasiou T, Darzi A. Can Patient Safety Incident Reports Be Used to Compare Hospital Safety? Results from a Quantitative Analysis of the English National Reporting and Learning System Data. *PLoS One*. 2015;10(12):e0144107.
6. Illingworth KD, Shaha SH, Tzeng TH, Sinha MS, Saleh KJ. The impact of tort reform and quality improvements on medical liability claims: a tale of 2 States. *American journal of medical quality : the official journal of the American College of Medical Quality*. 2015;30(3):263-70.
7. Iverson RE, Jr., Heffner LJ. Patient safety series: obstetric safety improvement and its reflection in reserved claims. *Am J Obstet Gynecol*. 2011;205(5):398-401.
8. Milne JK, Lalonde AB. Patient safety in women's health-care: professional colleges can make a difference. The Society of Obstetricians and Gynaecologists of Canada MORE(OB) program. *Best Pract Res Clin Obstet Gynaecol*. 2007;21(4):565-79.
9. Pegalis SE, Bal BS. Closed medical negligence claims can drive patient safety and reduce litigation. *Clin Orthop Relat Res*. 2012;470(5):1398-404.
10. Pettker CM, Thung SF, Lipkind HS, Illuzzi JL, Buhimschi CS, Raab CA, et al. A comprehensive obstetric patient safety program reduces liability claims and payments. *American Journal of Obstetrics & Gynecology*. 2014;211(4):319-25.
11. Riley W, Meredith LW, Price R, Miller KK, Begun JW, McCullough M, et al. Decreasing Malpractice Claims by Reducing Preventable Perinatal Harm. *Health Serv Res*. 2016;51 Suppl 3:2453-71.
12. Simpson KR, Kortz CC, Knox E. A comprehensive perinatal patient safety program to reduce preventable adverse outcomes and costs of liability claims. *The Joint Commission Journal on Quality and Patient Safety*. 2009;35(11):565-74.
13. Doyle C, Lennox L, Bell D. A systematic review of evidence on the links between patient experience and clinical safety and effectiveness. *BMJ open*. 2013;3(1).
14. Greenberg MD, Haviland AM, Ashwood JS, Main R. Is better patient safety associated with less malpractice activity? Evidence from California. Santa Monica, California: RAND Corporation; 2010.
15. McCleery A, Devenny K, Ogilby C, Dunn C, Steen A, Whyte E, et al. Using medicolegal data to support safe medical care: A contributing factor coding framework. *J Healthc Risk Manag*. 2018.
16. Quality AfHRa. AHRQ Quality Indicators™ (AHRQ QI™) ICD-9-CM and ICD-10-CM/PCS Specification Enhanced Version 5.0. Rockville, MD: U.S. Department of Health and Human Services; 2015.
17. Mardon RE, Khanna K, Sorra J, Dyer N, Famolaro T. Exploring relationships between hospital patient safety culture and adverse events. *Journal of Patient Safety*. 2010;6(4):226-32.
18. Kemp KA, Santana MJ, Southern DA, McCormack B, Quan H. Association of inpatient hospital experience with patient safety indicators: a cross-sectional, Canadian study. *BMJ open*. 2016;6(7):e011242.
19. Gray DM, 2nd, Hefner JL, Nguyen MC, Eiferman D, Moffatt-Bruce SD. The Link Between Clinically Validated Patient Safety Indicators and Clinical Outcomes. *American Journal of Medical Quality*. 2017;32(6):583-90.
20. Rosen AK, Rivard P, Zhao S, Loveland S, Tsilimingras D, Christiansen CL, et al. Evaluating the patient safety indicators: How well do they perform on veterans health administration data? *Medical care*. 2005;43(9):873-84.

## Tables and Figures

**Table 1. Selected Patient Safety Indicators reported in the Discharge Abstract Database, 2005–2015**

| Patient safety indicator                                                             | Number of incidents<br>(n = 339,741) | Model                     |                             |
|--------------------------------------------------------------------------------------|--------------------------------------|---------------------------|-----------------------------|
|                                                                                      |                                      | Surgical<br>(n = 168,886) | Obstetrical<br>(n = 97,982) |
| PSI 02 – Death rate in low-mortality diagnosis related groups                        | –                                    |                           |                             |
| PSI 03 – Pressure ulcer rate                                                         | 38,136                               |                           |                             |
| PSI 04 – Death rate among surgical inpatients with serious treatable conditions      | –                                    |                           |                             |
| PSI 05 – Retained surgical item or unretrieved device fragment count <sup>†</sup>    | 1,979                                | ✓                         |                             |
| PSI 06 – Iatrogenic pneumothorax rate                                                | 21,343                               |                           |                             |
| PSI 07 – Central venous catheter–related bloodstream infection rate                  | 13,394                               | ✓                         |                             |
| PSI 08 – Postoperative hip fracture rate                                             | 16,848                               |                           |                             |
| PSI 09 – Perioperative hemorrhage or hematoma                                        | –                                    |                           |                             |
| PSI 10 – Postoperative physiologic and metabolic derangement rate                    | 12,009                               | ✓                         |                             |
| PSI 11 – Postoperative respiratory failure rate                                      | 5,453                                | ✓                         |                             |
| PSI 12 – Perioperative pulmonary embolism or deep vein thrombosis rate               | 32,066                               | ✓                         |                             |
| PSI 13 – Postoperative sepsis rate                                                   | 7,450                                | ✓                         |                             |
| PSI 14 – Postoperative wound dehiscence rate                                         | 5,781                                | ✓                         |                             |
| PSI 15 – Accidental puncture or laceration rate                                      | 87,132                               | ✓                         |                             |
| PSI 16 – Transfusion reaction count                                                  | 168                                  | ✓                         |                             |
| PSI 17 – Birth trauma rate – injury to neonate                                       | 15,827                               |                           | ✓                           |
| PSIs 18 and 19 – Obstetric trauma rate – vaginal delivery with or without instrument | 82,155                               |                           | ✓                           |

Source: Agency for Healthcare Research and Quality. Patient Safety Indicators Version 5.0.

Note: Within the same model, if a case from the Discharge Abstract Database involved more than one patient safety indicator event, it was counted only once. Some records involved multiple indicator events for different models and were counted separately for different models.

**Table 2. Distribution of CMPA cases used in modelling by type; n = 15,180**

| Case type                      | Model; number of cases |             |          |
|--------------------------------|------------------------|-------------|----------|
|                                | All cases              | Obstetrical | Surgical |
| Legal                          | 3,639                  | 521         | 1,820    |
| Regulatory authority complaint | 3,757                  | 270         | 1,200    |
| Hospital complaint             | 7,643                  | 73          | 1,527    |
| Other*                         | 141                    | 1           | 21       |

\*Includes human rights complaints, inquests, and privacy investigations.

CMPA = Canadian Medical Protective Association.

**Table 3. Modelling results**

| Parameter             | Model; estimate (95% CI) |                        |                         |
|-----------------------|--------------------------|------------------------|-------------------------|
|                       | All cases                | Obstetrical            | Surgical                |
| Intercept             | –1.20 (–2.00 to –0.40)   | –1.72 (–3.74 to 0.29)  | –1.15 (–1.85 to –0.45)  |
| PSI event volume      | 1.15 (0.4 to 1.90)       | 2.91 (0.53 to 5.28)    | 0.92 (0.17 to 1.67)     |
| Region                |                          |                        |                         |
| Alberta               | –0.15 (–0.18 to –0.13)   | –0.43 (–0.50 to –0.37) | 0.20 (0.18 to 0.21)     |
| British Columbia      | –0.11 (–0.12 to –0.09)   | –0.61 (–0.92 to –0.31) | 0.12 (0.003 to 0.24)    |
| Ontario               | 0.09 (0.08 to 0.09)      | –0.23 (–0.40 to –0.07) | 0.22 (0.21 to 0.23)     |
| Rest of Canada        | –                        | –                      | –                       |
| Year                  | 0.09 (0.03 to 0.15)      | –0.24 (–0.31 to –0.17) | 0.22 (0.17 to 0.28)     |
| Year <sup>2</sup> *   | –0.01 (–0.02 to –0.004)  | –                      | –0.03 (–0.03 to –0.02)  |
| Region*Year           |                          |                        |                         |
| Alberta*Year          | 0.03 (0.02 to 0.03)      | 0.10 (0.08 to 0.11)    | –0.04 (–0.04 to –0.03)  |
| British Columbia*Year | 0.02 (0.02 to 0.02)      | 0.12 (0.06 to 0.18)    | –0.02 (–0.04 to –0.001) |
| Ontario*Year          | –0.02 (–0.02 to –0.01)   | 0.05 (0.02 to 0.09)    | –0.04 (–0.05 to –0.04)  |

Rest of Canada\*Year

\*The higher-order year variable ( $\text{year}^2$ ) was not significant and was thus removed from the final model. Note: These parameter estimates can as alternately be depicted as equations:

$\text{Log}(\text{medico-legal case volume}) = 1.15 * \text{PSI event volume} + (\text{Intercept} + \text{control variables})$ , for the overall model

$\text{Log}(\text{medico-legal case volume}) = 2.91 * \text{PSI event volume} + (\text{Intercept} + \text{control variables})$ , for the obstetrical model

$\text{Log}(\text{medico-legal case volume}) = 0.92 * \text{PSI event volume} + (\text{Intercept} + \text{control variables})$ , for the surgical model

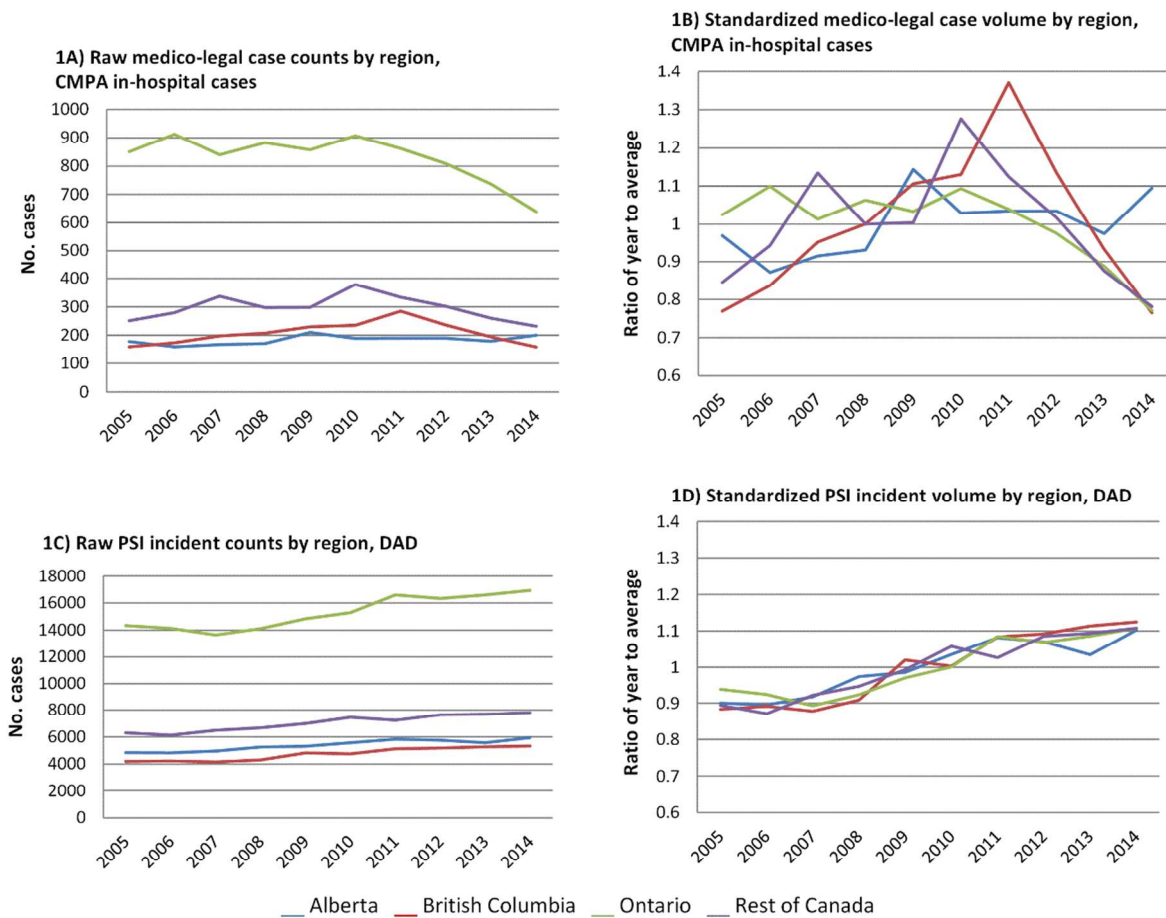

**Figure 1. Actual and standardized medico-legal case and PSI incident counts by region**

CMPA = the Canadian Medical Protective Association; PSI = patient safety indicator; DAD = discharge abstract database.

**APPENDIX A: MODEL RESULTS FOR RELATIONSHIP OF CHANGES OF PSI EVENT AND MEDICO-LEGAL CASES**

i) All-specialty model results

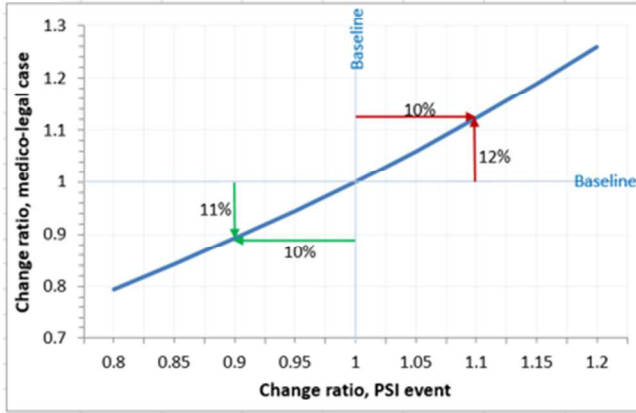

ii) Obstetrics model results

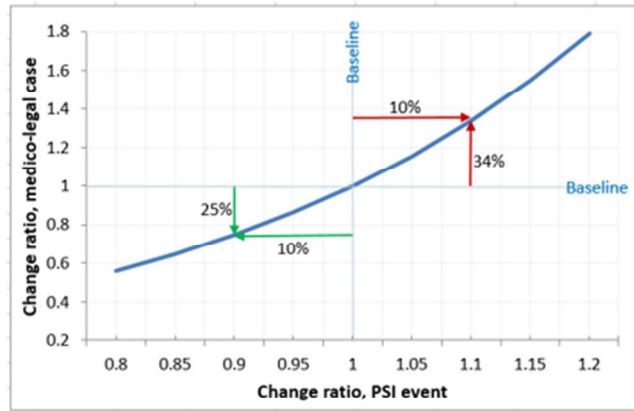

iii) Surgical model results

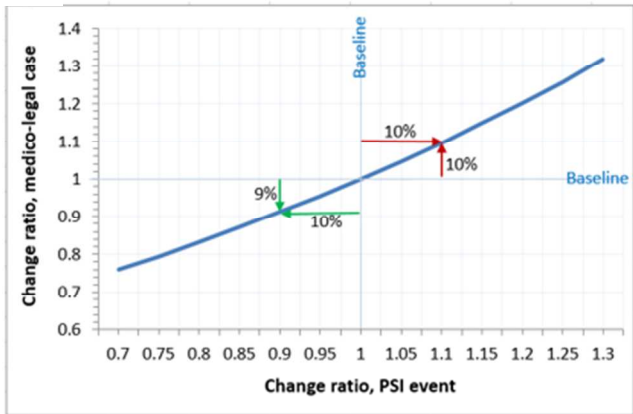

12
